1 **Barriers and enablers to accessing HIV services at South Sudan military facilities: Using**  
2 **qualitative data for program improvement**

3 **Authors: Ally A. R. Lasu\*, Awin Changjowk\*, Shanice Fezeu Meyou\*, Habib D.**  
4 **Awongo\*, R. Craig Lefebvre\*, Justin Tongun\*\*\*, John Woja Elinana, \*\*, and Lauren**  
5 **Pindzola Courtney\***

6 **\*RTI International**  
7 **\*\* South Sudan Peoples Defense Forces' HIV Secretariat**  
8 **\*\*\*Ministry of Health, South Sudan**

## 9 ABSTRACT

10 **Introduction.** South Sudan established an HIV program for the South Sudan People's Defense  
11 Force (SSPDF) in 2006, recognizing the potential national security threat posed by HIV's impact  
12 in post-conflict settings. By 2018, the SSPDF program's scope had expanded to include three  
13 VMMC clinics and four ART service delivery facilities. This qualitative study examined  
14 participant feedback on two existing HIV services, ART and VMMC, with the goal of  
15 identifying and prioritizing barriers and improving program performance. We used focus group  
16 discussions to gather information from male and female participants chosen at random across the  
17 four main project sites.

18

19 **Methods.** We conducted a cross-sectional qualitative study from March to April 2022 involving  
20 177 people (108 men and 69 women) within fifteen focus group discussions. We collected data  
21 on enablers and barriers to HIV service uptake and utilization using a thematic framework  
22 approach.

23

24 **Results.** Perceived high-quality HIV services in a secure environment, organizational support  
25 systems, peer-led mobilization, and transportation facilitation were all identified as HIV service  
26 delivery enablers. HIV service delivery was hampered by knowledge gaps, poverty and food  
27 insecurity, access issues, a lack of treatment support groups, transportation challenges, social  
28 cultural barriers (stigma and discrimination), and the need for permission from commanders.

29

30 **Conclusions.** The findings show some overlap in client needs for VMMC and ART services. To  
31 increase ART retention and overall HIV service demand, the program will focus on improving  
32 the quality of HIV services and tailored client support, as well as addressing barriers resulting  
33 from structural and social cultural challenges to increase ART retention and overall HIV service  
34 demand.

## 35 INTRODUCTION

36 In 2011, the Republic of South Sudan proudly became the world's newest nation and  
37 Africa's 55th country. Since then, development efforts in South Sudan have slowed because of  
38 recurring internal conflict, insecurity, and the COVID-19 pandemic (1), leading to poverty, food  
39 insecurity, deficits in education and health systems, internally displaced people, and other post-  
40 conflict effects (2-7). Ethnic conflicts in 2013 and 2016 have led to armed groups targeting  
41 civilians, destabilized new establishments, and displaced people (2-5, 8). The economic crisis  
42 and disruption in farming led to famine in many parts of the country. Additionally, reduced  
43 harvest, cattle theft, poaching, and flooding left more than 8 million people food insecure in 2019  
44 (3, 4). Gender-based violence against women has been fueled by this ongoing instability,  
45 violence, and displacement. More than 4 million people remained displaced in 2022, which  
46 directly affects livelihood, education, social protection, and access to health services (6).  
47 Although recent developments aim to strengthen the health system, preventable/treatable  
48 communicable diseases such as HIV pose as a major threat and a leading cause of death in South  
49 Sudan. (7, 9-12). As South Sudan recovers from years of conflict, this fragile setting impacts the  
50 communities, the health system's infrastructure, and their capacity for prevention, surveillance,  
51 and treatment, signifying an imperative leap toward peace (12).

52 The South Sudan National Strategic Plan for HIV/AIDS (2021-2023) (13) prioritized  
53 increased access to quality HIV care, treatment, treatment as prevention, and TB/HIV  
54 collaboration. South Sudan's HIV epidemic is classified as low and generalized with a  
55 prevalence rate of 1.9 among adults aged 15-49 (14) ; however, pockets of HIV are concentrated  
56 among key and vulnerable populations, where the prevalence is 5% or higher (15). Although  
57 globally and regionally new HIV infections are decreasing and treatment is increasing (16), in  
58 South Sudan there are an unknown number of people living with HIV (PLHIV) who are virally

59 suppressed and only an estimated 35% of people living with HIV know their status (14). The  
60 Ministry of Health (MoH) and related bodies have the national mandate of overseeing health care  
61 delivery in South Sudan. The unique HIV threats faced by the military, on the other hand,  
62 necessitate a contextualized forces policy to fill gaps left by the national program.

63 In 2006 South Sudan established an HIV program for the South Sudan People's Defense  
64 Force (SSPDF), recognizing the potential national security threat from HIV's impact. The HIV  
65 Secretariat oversees the program, which is tasked with planning, developing, and implementing  
66 quality HIV prevention, care, treatment, support, and impact mitigation services for military  
67 personnel, their families, and host communities. The military HIV program addresses institution-  
68 specific issues such as military personnel culture, access, deployment patterns, and the general  
69 work environment. The program has evolved from a narrow focus at Juba Military Hospital  
70 (JMH) in the capital city to a more expansive HIV care and treatment program, opening clinics  
71 in Wau Military Hospital (WMH) and Malual Chaat Military Hospital (MCH) in 2018 and 2021,  
72 respectively. Voluntary medical male circumcision (VMMC) services were introduced in JMH in  
73 2018 and expanded to WMH and MCH in 2021. Despite these achievements, there is still a  
74 significant unmet need for HIV services among the military population (15).

75  
76 Although ART and male circumcision are proven to be effective in reducing HIV-related  
77 morbidity, mortality, and transmission, addressing barriers impacting client access, program  
78 uptake, and coverage is critical to improve services, activities, stigma, and inequity (17). Used as  
79 part of combined prevention, the effectiveness of male circumcision in reducing sexual  
80 transmission of HIV from HIV-positive women to HIV-negative men has been shown in  
81 randomized control trials conducted in Kenya (18), South Africa (19), and Uganda (20) and

82 consequently widely accepted since 2007 (21). Due to these achievements, the Joint United  
83 Nations Programme on HIV/AIDS (UNAIDS) investment framework (22) recognized male  
84 circumcision as one of the “basic program activities” with proven effectiveness in HIV  
85 prevention in generalized epidemics with a low prevalence of male circumcision. Additionally,  
86 investments in HIV response increase access to ART, with the goal of eliminating HIV as a  
87 global public health threat by 2030 (23). This strategy uses an array of biomedical, behavioral,  
88 and structural approaches (e.g., sexually transmitted disease control, voluntary counseling and  
89 testing, harm reduction, mother-to-child transmission prevention, blood safety, infection control  
90 in health care, structural interventions, and HIV-treatment programs and medical male  
91 circumcision) to achieve maximum impact.

92 Factors such as marginalization and stigmatization continue to pose as challenges and  
93 barriers especially among vulnerable populations. Access to HIV services may be hampered or  
94 mitigated by a variety of factors that occur at the individual, health provider, or health system  
95 level(24). Findings from studies conducted in Kenya (25), Uganda (26, 27), and Malawi (28)  
96 showed that the barriers and facilitators to care linkage are multifactorial. Major barriers include  
97 a lack of social networks, economic vulnerability, and fear of the consequences of stigma.  
98 Overcrowded clinics, unwelcoming staff, and unintegrated facilities resulted in linkage failure at  
99 the program level. Socioeconomic support from networks of health providers, family members,  
100 and friends was a key facilitator of linkage to HIV services.

101 This paper takes a novel approach to complement other efforts to understand the barriers  
102 and enablers to HIV service delivery in South Sudan’s post conflict military settings. The  
103 qualitative study examined participant feedback on two existing HIV services, ART and VMMC,  
104 to identify and prioritize barriers and to improve program performance. For example ART

105 initiation and retention in treatment numbers at 12, 24, and 60 months, and client circumcised  
106 and adverse events reported for VMMC. Prior to this study, the South Sudan military HIV  
107 program had been implemented for military personnel, their families, and host communities  
108 without factoring in client perspectives about service delivery. RTI International/SSPDF, with  
109 support from the Department of Defense HIV/AIDS Prevention Program (DHAPP), aims to  
110 make HIV and VMMC services available and accessible to the wider military population at  
111 substantial HIV risk within the project catchment areas. However, there is limited information on  
112 beneficiary population perspectives about HIV services in those locations. Understanding the  
113 perspectives and preferences of HIV service beneficiaries, especially ART and eligible VMMC  
114 clients, is essential to designing programs that meet clients' needs. Additionally, few studies  
115 have described how they have used data to improve program performance.

116         These are not new programs; ART services have been available in the South Sudan  
117 military since 2008, and VMMC services have been available since 2018. Because effective HIV  
118 prevention and treatment services are now available, RTI plans to use the study findings to  
119 expand tailored socio-behavioral change services by developing a comprehensive demand  
120 creation plan to address military and host community acceptance of, and generate demand for,  
121 these public health interventions to increase ART retention and overall HIV service demand. The  
122 implementation of the demand creation plan will be based on our experience designing and  
123 implementing socio-behavioral change programs to promote uptake of health products and  
124 services, including ART and VMMC services, but will also draw on best practice tools  
125 developed by PEPFAR and UNAIDS. Before implementing and adjusting activities to respond to  
126 changing public health programming conditions, providers will use the resulting demand creation

127 plan to define and understand local military community needs. Importantly, the demand creation  
128 plan will be updated on a regular basis to ensure that its components remain relevant and useful.

## 129 **METHODS**

130 **Setting.** In March 1-April  
131 30, 2022, we conducted 15 mixed-  
132 gender focus group discussions  
133 (FGDs) to identify barriers and  
134 enablers to accessing routine ART  
135 and VMMC services provided at  
136 three of four project sites where  
137 clients present voluntarily for free  
138 HIV services: JMH, WMH, and  
139 MCH.

### **Definition of Terms Used: Enablers, Barriers, and Treatment Supporters**

- **Enablers**, as used in this study, are strategies, activities, and approaches aimed at improving accessibility, acceptability, uptake, equity, quality, effectiveness, and efficiency of HIV interventions. Enablers operate at all levels of society—at individual, community, institutional, societal, and national, regional, and global levels.
- **Barriers**, as used in this study, are impediments to HIV service uptake, including structural, sociocultural exclusion and marginalization, stigma, and inequity. If left unaddressed, these barriers will undermine the provision of HIV services, especially for priority populations such as the military.
- **A treatment supporter** is any person (including a family or PLHIV support group member) who is willing to help play a vital role in guiding and motivating HIV patients during their care and treatment; they are accepted by the patient and routinely engage with the health services (29).

140 **Participant recruitment.** The FGD study gathered qualitative data from five FGD  
141 groups at each of the three program sites. Three VMMC-focused groups included circumcised  
142 males, non circumcised males, and female relatives of soldiers. Two ART-focused groups  
143 included ART-stable and ART-unstable clients.

144 For each focus group session, we invited seven to nine potential participants targeting  
145 specific ages and genders to ensure representation, as guided by site-specific program data. RTI  
146 screened potential participants; those who met the study criteria and agreed to participate were  
147 assigned to the appropriate FGD sessions. We confirmed ART adherence status through client  
148 records at the facilities; we assessed male circumcision status through self-reporting. We  
149 obtained verbal informed consent, which was documented in the participant log and basic

150 demographic data from all participants. Approval for the study was obtained by RTI's  
151 Institutional Review Board.

152 **Data collection.** We conducted the FGDs in English; a trained moderator translated them  
153 into local languages (Dinka and Juba Arabic) as needed. The moderator used a semistructured  
154 questionnaire to facilitate the discussions with open-ended and probing questions. A notetaker  
155 recorded responses in real time, using audio-recordings to provide partially transcribed notes and  
156 translate all notes into English; audio-recordings allowed us to review for quality assurance. We  
157 provided each participant refreshments and travel cost reimbursement of about \$20USD.

158 **Data collection instruments.** Standardized interview questions were developed for each  
159 type of respondent. Sample interview questions are shown below.

#### Sample Interview Questions

- How would you describe our services?
- Based on your experience with our services, would you return for services?
- What are three important feature that you think we are missing?
- In your opinion, what important services currently provided at the ART clinic would you like to see continue?
- What are your biggest challenges in attending services at SSPDF facilities?
- Do you have a clear understanding of how to navigate or find different service points around this health facility?
- Do you think clients would like to be connected to peer support network? This would be a network of people taking ARVs like themselves to support and encourage them to ensure their treatment is not interrupted.

160 **Data analysis.** We used an inductive analytic approach to identify and describe the  
161 barriers and enablers of HIV service delivery in the DHAPP program. Two researchers reviewed  
162 the FDG notes and audio-recordings to identify key themes related to the topic. They grouped the  
163 themes and examined the narratives of FGD sessions per location. A senior researcher  
164 independently reviewed the transcripts to assess consistency and accuracy of themes identified.  
165 Areas of inconsistency were discussed with the moderator, noting definitions and context. The



166 researchers discussed the findings and wrote summary notes and placed themes into analysis  
167 tables. Final results were written to reflect all themes identified.

168 **Using qualitative data for program improvement.** Program leadership used the FGD  
169 data to identify program successes, needs for program improvements, and solutions.  
170 Additionally, leadership validated the outcomes with other available data sources such as routine  
171 program site visits, standard project listening sessions with SSPDF, and in-depth reviews with  
172 the implementation team. Integrating military perspectives into decision-making at all stages of  
173 programming planning and implementation is a key element of effectively using these data  
174 sources.

175 We examined FGD-identified barriers using a two-factor model to prioritize which  
176 barriers to address first. First, *“Is this barrier within our control to solve?”*; in other words, does  
177 the solution fit into the project scope, is there sufficient funding, is this reasonable to address  
178 within the period of the project? Second, *“To what extent does this impact clients receiving  
179 services?”* We used multiple data points to determine client impact, including the extent to which  
180 focus group participants discussed this issue, if multiple sites were impacted, and if this was an  
181 issue for both ART and VMMC.

## 182 RESULTS

183 All 177 clients recruited at the three sites were eligible, and all consented to participate,  
184 as shown in Table 1.

185 **Table 1. FGD Participants by Gender and Site**

| Facility Name          | Males | Females |
|------------------------|-------|---------|
| Juba Military Hospital | 44    | 23      |
| Wau Military Hospital  | 24    | 26      |

---

|                               |            |           |
|-------------------------------|------------|-----------|
| Malual Chat Military Hospital | 40         | 20        |
| <i>Total</i>                  | <i>108</i> | <i>69</i> |

---

186

187 We describe the specific ART and VMMC enablers and barriers below, in addition to  
188 participant perspectives based on their interaction with the program.

189 **Enablers**

190 **Staffing (ART and VMMC).** Overwhelmingly, both ART-stable and Interruption in  
191 Treatment (IIT) participants from all three sites expressed gratitude for the welcoming nature of  
192 the ART providers. JMH clients in particular were more likely to comment on the welcoming  
193 nature of its staff; JMH has been in operation the longest. Participants particularly valued their  
194 providers' openness, honesty, and level of confidentiality when offering HIV services. A current  
195 JMH ART client noted, *"Doctors have a good approach to clients and offer words that calm my  
196 heart. Seeing that I have no help from my children which is a challenge."*

197 VMMC participants pointed out that the staff at the VMMC clinics treat all their clients  
198 with dignity and respect. They ensure that clients feel welcome and receive health education  
199 while addressing language difficulties as needed and supporting clients to utilize all the available  
200 services. When asked about their experience and whether they would return for additional  
201 services or recommend them to others, Bor (MCH) participants responded: *"Yes, I will come  
202 back because services are good and to bring other people because I know this place", "Yes,  
203 environment is good, doctors are polite and quality circumcision service.", and "Yes, I am likely  
204 to recommend these services for it is because of good quality, free of services, and free  
205 transport."*

206           **Peer/social support (ART).** ART participants frequently mentioned receiving emotional  
207 or material support from a support group, family member, friend, or a community health worker.  
208 Participants cited supporters’ traits such as trustworthiness, availability, and good  
209 communication as factors beneficial to a successful partnership. Some peer supporters helped  
210 participants by teaching them how to navigate the health system and encouraging them to keep  
211 track of their pill count and clinic appointment dates. A participant at WMH shared her  
212 experience with a community health worker: *“A lady took my phone number, and then checked*  
213 *on me – I am happy. Usually when I don’t show up, they call to ask me why I have not come for*  
214 *medication. Which is good.”* In these settings where facility staff numbers are inadequate,  
215 community health workers are critical in addressing patient challenges including psychosocial  
216 and adherence issues.

217           ART participants in MCH and WMH mentioned the need for treatment supporters. One  
218 participant noted that the *“Support group can help me when I am frustrated or missed an*  
219 *appointment.”* Another client highlighted the psychosocial support: *“The group will check and*  
220 *encourage each other to relieve thoughts and stress.”* Other clients also emphasized the  
221 importance of treatment supporters in treatment adherence *“...can help me through talking to me*  
222 *and in taking medicine.”* Several participants echoed the idea of peer supporters providing life  
223 skills, hope, and a positive outlook on life to clients. Such interventions increase clients’  
224 individual and social motivation, resulting in the expansion of support networks and the  
225 promotion of optimism and positive living. Another participant reiterated the type of support  
226 they received from a health worker: *“There was a [health provider], he had a vehicle. He would*  
227 *call and if you are very sick, he would come looking to check on you and bring your medication.”*

228 Such community outreach clearly contributes to enhanced HIV service delivery quality and  
229 uptake and by extension the dignity and quality of life of the clients.

230 **Organizational support (ART).** The program provides mobile phone–based reminders  
231 of scheduled HIV appointments for clients. Other support available for clients includes  
232 multimonth dispensing, community tracing, and relinkage of clients who experience interruption  
233 in treatment. Most participants appreciated receiving reminder and follow-up calls for their  
234 appointment or picking up their antiretroviral (ARV) refill medication. Tracking and following  
235 up of IIT clients and counseling are critical approaches that clients agree are necessary for  
236 patients to continue with their treatment. A client added: “*They contact you by phone to ask you*  
237 *why you have not come. They also send someone to look for you at your residence in case you*  
238 *don’t show up.*”

239 **Client transport facilitation (VMMC).** Participants shared that the provision of  
240 transport to and from the facility saved them money.

241 **Safety (VMMC).** Participants expressed surprise that they felt safe within the clinic,  
242 even sitting together with other clients from the diverse ethnic and political backgrounds that had  
243 been in conflict. Because of the 2016 civil war in the MCH area, participants noted their fear of  
244 leaving the safety of their UN compounds to come to the clinic. One woman had never left the  
245 UN compound, noting that the facilitator convinced her to come to the FGD; she was amazed  
246 that she could walk freely through town. A participant commented that the VMMC clinic was  
247 “*peace building*” between two tribes through their accessing services together. Despite the  
248 prevailing ethnic tensions after the 2016 conflict, participants reported that they felt no  
249 discrimination or fear of being attacked or harmed during the whole process.

250 **Peer-led mobilization (VMMC)** as a component of the VMMC intervention including  
251 community mobilization was valued by clients. One participant in Wau stated: *“I mobilized more  
252 than 15 clients for circumcision to come to this clinic because the services are good, and I will  
253 continue to do so.”*

#### 254 Barriers

255 Barriers, as used in this study, are impediments to HIV service uptake, including  
256 structural, sociocultural exclusion and marginalization, stigma, and inequity. If left unaddressed,  
257 these barriers will undermine the provision of HIV services, especially for priority populations  
258 such as the military.

259 **Funding for transport (ART).** Many participants agreed that addressing the  
260 transportation challenge would improve access and minimize client dropout. A client said: *“If  
261 there was a way for easing the transport challenge, patients would be helped to reach their drug  
262 pick up location. This is because if you don’t have money for transport, you will not come to pick  
263 your medication.”* This was particularly noted in Juba.

264 **Food insecurity (ART).** Most participants believed that providing food to PLHIV would  
265 improve treatment numbers. They shared that lack of food is a barrier to consistently taking  
266 medication. One client stated: *“One day I took my drugs when there was no food and I felt dizzy,  
267 so I stopped taking the drugs”* and added *“I stop taking my drugs every time I do not have food.”*  
268 The practice of delaying ART medication because of lack of food was a recurrent theme in some  
269 groups. According to the participants, taking ARV drugs with juice was requested in multiple  
270 groups to help the pills go down more easily.

271 Female participants were more vocal about this problem. They highlighted the lack of  
272 employment opportunities and suggested being given business loans which would empower  
273 them to set up businesses to address the food insecurity problem in the long term.

274 **Stigma and discrimination (ART).** Nearly all participants discussed perceived  
275 community stigma as a barrier with extreme community-level stigma noted at MCH; comments  
276 on this topic were lengthy. Participants described how stigma undermines one's identity and  
277 capacity to cope with the disease. Multiple participants reported hiding their medications for fear  
278 of household members discovering they were HIV positive. Facilitators commented that the  
279 WMH and MCH sessions for IIT participants were emotionally touching; all participants' stories  
280 were difficult to hear. Women spoke up more than men and told their truth.

281 One participant had delayed HIV testing because of fear, and thus, treatment was  
282 delayed. Fear of discrimination and of potential rejection within his immediate family and  
283 community prevented his disclosure to even his close family. He said: "*This disease is top secret,*  
284 *and no one must know at all apart from doctors.*" In MCH, a participant reported that he may not  
285 want to keep or take his medications at home for fear of being discovered by family. "*I fear*  
286 *taking medication when other people are present in the house.*" Learning that one is on ART  
287 medication may create hostility from family members who hold negative attitudes and beliefs  
288 about HIV, potentially leading to disruption in family harmony.

289 **Stigma/social cultural attitudes (VMMC).** All VMMC participants agreed that they  
290 knew about VMMC, but some specifically emphasized the sociocultural barriers to adopting the  
291 practice.

292 One participant noted: "*I know well about medical circumcision but...Dinka Bor culture*  
293 *does not allow male circumcision, despite it being practiced in town.*" Another participant stated

294 that: *“I’m married and for me to get circumcised, my wife must agree before I do it and will not*  
295 *be circumcised if my wife refuses.”*

296 One participant reflected the reason for his hesitation: *“Male circumcision should be*  
297 *agreed to by our female counterparts to avoid divorce. A wife of my friend divorced after his*  
298 *circumcision.”* Another expressed fear and stigma: *“I’m aware about the service and its*  
299 *importance, but I’m not ready to be circumcised, fearing community abuse. In my community*  
300 *circumcision is not allowed and if one does it, you and your children will be abused until your*  
301 *death.”*

302 **Knowledge gaps (ART and VMMC).** Confusing VMMC with traditional circumcision,  
303 some participants only know the traditional circumcision that is conducted by traditional healers  
304 within the villages under poor hygienic conditions. So, they confuse VMMC with that approach,  
305 leading to some men and women expressing unfounded fear of incompetent providers and  
306 potential adverse events such as bleeding, swelling (keloids), and pain after medical  
307 circumcision. Participants on ART emphasized the lack of routine counseling to address  
308 knowledge gaps about the ART's side effects. Some participants even inquired about the  
309 availability of injectable ART and single-dose medication for children in South Sudan.

310 **Limited access (ART and VMMC).** Some participants highlighted lack of access to  
311 VMMC services within their localities. Available services are few and are located within military  
312 garrisons, which for some may be far from where military and host communities reside. This  
313 usually impacts access because of high costs or limited transport options.

314 For ART services, IIT participants indicate the long distance to the clinics, and other  
315 access issues, prevented them from seeking regular treatment. This was true for participants  
316 newly on treatment who cannot benefit from community refills.

317 Using Data for Program Improvement

318 We summarize enablers and barriers in Tables 2 and 3, indicating which focus group  
 319 clients (VMMC or ART) remarked on the issue and (for Table 3) if resolution of this issue was  
 320 within the project’s control.

321 **Table 2. Summary of Enablers Key for ART and VMMC Clients in South Sudan**

| Order of Priority | Enablers                      | Description                                                                                          | ART | VMMC |
|-------------------|-------------------------------|------------------------------------------------------------------------------------------------------|-----|------|
| 1                 | Staffing                      | Positive experiences with welcoming clinic staff                                                     | ✓   | ✓    |
| 2                 | Peer/social support           | Peer support groups available                                                                        | ✓   |      |
| 3                 | Organizational support        | Client support such as appointment reminders, multimonth dispensing, community-tracing and relinking | ✓   |      |
| 4                 | Client transport facilitation | Transportation to the clinic is provided for clients                                                 |     | ✓    |
| 5                 | Safety                        | Clients feel safe at the clinic                                                                      |     | ✓    |
| 6                 | Peer-led mobilization         | Clients share positive experiences with peers, encouraging them to join                              |     | ✓    |

322

323 **Table 3. Model for Prioritizing Barriers for ART and VMMC Clients**

| Priority Groups | Barrier        | Problem                  | ART | VMMC | Within Project Control |
|-----------------|----------------|--------------------------|-----|------|------------------------|
| 1               | Knowledge gaps | Myths and misconceptions | ✓   | ✓    | ✓                      |



| Priority Groups | Barrier                     | Problem                                                                                                    | ART | VMMC | Within Project Control |
|-----------------|-----------------------------|------------------------------------------------------------------------------------------------------------|-----|------|------------------------|
|                 | Access issues               | Limited service points                                                                                     | ✓   | ✓    | ✓                      |
| 2               | Support groups              | Lack of strong, organized PLHIV groups that can contribute to reduction of stigma within their communities | ✓   |      | ✓                      |
|                 | Treatment support           | Clients across ART sites still struggle with access to treatment supporters                                | ✓   |      | ✓                      |
|                 | Transport                   | Transport costs                                                                                            | ✓   |      | ✓                      |
| 3               | Permission from commander   | Commanders must provide permission since soldiers must miss work                                           |     | ✓    | ✓                      |
| 4               | Sociocultural               | Stigma                                                                                                     | ✓   | ✓    | ✗                      |
|                 | Safety                      | Clients' fear of leaving the safety of their UN compounds because of the 2016 civil war                    |     | ✓    | ✗                      |
|                 | Poverty and food insecurity | Women empowerment to address family nutrition                                                              | ✓   |      | ✗                      |

324

325

326 **DISCUSSION**

327 As a nascent post-conflict country, South Sudan's myriad infrastructure, human resource,  
328 and structural challenges plague public service delivery, especially health services. Findings  
329 from our focus groups identified enablers and barriers to HIV service delivery, allowing our  
330 team to prioritize strategies to improve program performance.

331 Enablers of HIV service delivery include the perceived high quality of services,  
332 satisfaction with the providers and services, and availability of transport. This feedback shows  
333 that participants hold positive relationships with their providers; the human touch is critical for  
334 driving client demand for services and creating a friendly facility. Because some of these clients  
335 lack peer support, they are less likely to engage in HIV care, and thus program facility staff  
336 become a valuable resource for client engagement and adherence to care. Staff at the facility can  
337 assist clients in making sense of confusing health information, provide psychosocial support,  
338 influence their treatment-related behaviors, navigate the health care system, and improve  
339 relationships with peers in their communities.

340 Maintaining free-of-cost HIV services, clean workspace, staff cooperation, privacy and  
341 confidentiality, and facilitating client transport, safety, and security, were stated as perceived  
342 indicators of the quality of HIV services offered at the three facilities. Thus, improving demand  
343 for HIV services may require addressing these factors. A welcoming environment, good  
344 communication, and respect for patients should be implemented in all the project facilities to  
345 promote these outlined socially acceptable practices. There is also need for integration of  
346 services at all sites to provide opportunities to deliver interventions across the spectrum of needs  
347 of HIV-infected military men and women and the affected communities. We also noted the  
348 willingness with which the potential clients from different ethnic groups/tribes agreed to be  
349 booked, meet at scheduled central meeting points, and be transported together at zero cost to the

350 VMMC site as a novel approach to promote peace. There is no reported case of discrimination  
351 against any client based on their tribe, ethnicity, religion, or political affiliation as they navigate  
352 the program health facilities.

353 We prioritized barriers by grouping them into four categories according to results shown  
354 in Table 3. Facilitator feedback noted the emotional strain participants expressed and difficulty  
355 they felt while conducting these FDGs; these topics are all critical for this extremely needy and  
356 vulnerable population. Although the team wished to address all issues highlighted, we prioritized  
357 them to enable positive changes moving forward.

358 **1-Top priority** factors that affect both ART and VMMC services and are within control  
359 of the program include **knowledge gaps** and **service access issues**.

360 **Knowledge gaps.** HIV/AIDS knowledge is low in South Sudan because of low literacy  
361 rates (34.5%) among both men and women, particularly among those in the military (15).

362 Traditional print and broadcast media that could be used to increase HIV awareness, such as  
363 radio, television, and new online media, are not accessible to a large portion of the population,  
364 both rural and urban. Furthermore, at the national and community levels, South Sudan lacks  
365 strong and diverse HIV champions to drive the HIV awareness and a mobilization agenda.

366 Therefore, the program will ensure that clients have social connections or “buddies” who are  
367 involved in providing accurate and reliable HIV treatment information to clients in their health  
368 journeys and to hold them accountable.

369 **Access barriers** to ART services have been reduced in key regional settings by  
370 establishing facilities in military-rich areas, with a plan to further decentralize services to address  
371 unequal access to ART in the surrounding areas. Some respondents reported that affordability  
372 barriers are significantly higher for clients in more remote settings. This finding is consistent

373 with South Sudan’s current HIV service delivery policy emphasis on strengthening community  
374 ART service delivery.

375 **2-High priority** factors affect only ART services; these include **support groups**.

376 **Support groups.** Although the program allows stable PLHIV to meet once a month to  
377 share treatment experiences and support one another, it lacks self-formed support groups in  
378 larger communities to follow up on and address their unique individual ART challenges.  
379 Although the military program has more than doubled its ART enrollment from 1,172 in 2019 to  
380 2,597 in 2022, low treatment retention rates, which are currently less than 50% for the program,  
381 threaten to undo the program’s gains in ART enrollment over the last 8 years. Attrition is often  
382 seen as the result of inadequate patient preparation, which causes treatment interruptions, and a  
383 lack of strong community-level support for new PLHIV. In 2020, the MOH and its partners  
384 developed guidelines and protocols while keeping structural constraints of patients and the health  
385 system in mind. This protocol gives the client the ability to collaborate with health providers,  
386 institutions, and others to improve their own care. Improved adherence, increased motivation and  
387 confidence, and mutual support, as observed by Sabin (30), result in higher levels of physical,  
388 psychological, and social well-being and improved health outcomes (30).

389 **3-Medium priority** factors affect VMMC only; these include **transport** and **permission**  
390 **from commanders**.

391 **Transport.** Similar to Ancia (31) findings, some participants were grateful for the free  
392 transport provided to the clinic for VMMC because otherwise they would need to walk long  
393 distances from their homes to the service point, since transportation is unavailable or too  
394 expensive (31). ART participants do not have access to transport, although the program provides  
395 community refills for stable clients.

396           **Permission from commanders.** The military is a hierarchical institution in which  
397 subordinates need permission from their commanders to seek treatment on or off the military  
398 base for extended periods of time. For a service like VMMC, where clients need about 3-4 weeks  
399 to fully recover, military leaders must be convinced that VMMC is critical for their troops.  
400 Potential clients have been denied leave to attend such services in some cases where  
401 commanders do not understand their roles and have not been sensitized about their troops' rights,  
402 including the right to life and health, and other human rights. The program continues to hold  
403 regular commander training sessions to ensure that new commanders are familiar with the HIV  
404 program, their roles in HIV service uptake and utilization, and that they remain accountable for  
405 the overall health of their troops.

406           **4-Low priority** factors are beyond the remit of the program; these include **safety,**  
407 **poverty/food insecurity, and stigma/sociocultural issues.**

408           **Safety.** Since the conflicts in 2013 and 2016, approximately 1.96 million South Sudanese  
409 have been internally displaced, with the majority residing in UN-managed civilian sites. Food  
410 insecurity continues to affect large segments of the South Sudanese population because of the  
411 economic downturn, civil insecurity, the lingering effects of floods, and the prolonged conflict.

412           **Poverty** is widespread, and most people rely on subsistence agriculture and humanitarian  
413 aid. The additional burden of managing a chronic illness in a resource-scarce environment makes  
414 PLHIV even more vulnerable and in need of support.

415           **Stigma.** Myths and misconception are powerful drivers of stigma (16) toward PLHIV in  
416 South Sudan. This leads to discrimination expressed by loss of jobs, intimate partner violence,  
417 expulsion from homes, and denial of basic health and other services such as leasing house. RTI  
418 has been able to provide HIV services in the four project facilities that are not perceived as

419 "stigmatizing" by clients and may serve as a "beacon of hope" for less stigmatizing attitudes and  
420 behaviors in the communities they serve. This was accomplished by collaborating closely with  
421 PLHIV clients around project facilities to help create an environment that provides patients with  
422 HIV with timely, appropriate, and humane HIV care services.

423 Sociocultural issues, especially gender roles and relationships, play a significant role in  
424 the transmission of HIV and perspectives on its prevention and treatment. Participants discussed  
425 the impact of HIV on their lives, their role in HIV prevention, and obstacles to accessing HIV  
426 services. A comprehensive, multidisciplinary, systemic approach that includes community-wide  
427 education and empowerment and modifying legal and social structures that contribute to the  
428 spread of HIV is suggested as a necessary addition to the current national response. Only by  
429 forging strong partnerships between the different actors in health, education, women and youth  
430 groups, and political, religious, and opinion leaders will the impact of HIV be reduced in South  
431 Sudan.

432 We will use the lessons learned to design interventions that are appropriate and  
433 acceptable to the beneficiary population; delivered by providers with relevant personal and  
434 community experience; and tailored to address sociocultural influences such as stigma and  
435 discrimination. The military leadership and RTI are committed to data analysis and use for real-  
436 time program course-correction, while engaging meaningfully with the beneficiaries. By  
437 continuously triangulating available information, we will improve service delivery and program  
438 content to reflect local realities. Maintaining close partnership with and education of military  
439 leadership is central to ownership and sustainability of the program.

## 440 **CONCLUSIONS/NEXT STEPS**

441 This study sought to ensure that HIV ART and VMMC programming in South Sudan is  
442 based on evidence; the program will adapt to local circumstances and target military community  
443 needs while promoting program effectiveness. We created a tiered system to prioritize client  
444 needs based on the barriers/enablers we identified from two HIV services (VMMC and ART)  
445 and those issues within project control. Our findings highlight some overlap in the needs of  
446 clients VMMC and ART services, enabling us to target both services to increase demand for HIV  
447 services. South Sudan's fragile post-conflict context is noteworthy and influences the needs of  
448 the HIV service delivery clients.

449 As next steps, we plan to use the FGD feedback to prioritize demand-creation  
450 interventions to address the factors above to increase ART and VMMC service uptake with  
451 several next steps:

- 452 • Creating a comprehensive HIV awareness model that addresses knowledge gaps and  
453 emphasizes service delivery point availability in the short term.
- 454 • Collaborating with the military program team to identify and nurture PLHIV support  
455 groups in each of the three ART program locations.
- 456 • In the long term, exploring ways to sustainably increase access to ART and VMMC  
457 service locations. The program will also reach out to military leadership to identify  
458 command channels for troops who want to undergo VMMC to obtain permission  
459 promptly.
- 460 • Continuing to reach out to relevant government officials, partners, and stakeholders  
461 who may have solutions to the issues of safety, poverty, and sociocultural issues.

462 **LIMITATIONS**

463           This study has several limitations that should be considered in future program  
464 improvement studies. Since the participants in this study were not chosen at random, the findings  
465 may not be applicable to all beneficiaries/patients served by the facilities. Recordings of the  
466 focus groups were not transcribed or translated because of programmatic costs. Translations  
467 were carried out during the sessions, with notes taken in English. Some participants in the ART-  
468 unstable focus groups revealed serious health conditions, with some requiring hospitalization  
469 during or immediately following the sessions. This could have limited their ability to participate  
470 effectively in the discussions. Because of the nature of group dynamics, “group think” may occur  
471 in focus group settings, resulting in themes that would not have emerged as frequently if  
472 interviews were conducted individually. Some discussion points may have been “lost in  
473 translation” because of language barriers in some study locations, because sessions required real-  
474 time translation, response, and note-taking. Despite these limitations, the study findings suggest  
475 several practical and programmatic implications that can help the SSPDF program improve  
476 service delivery.

477 **ACKNOWLEDGEMENTS**

478   We acknowledge the support of the DoD HIV/AIDS Prevention Program (DHAPP), as well as  
479 the SSPDF HIV secretariat and technical review and feedback from Katie Grimes.

480



## 481 REFERENCES

- 482 1. World Bank. The World Bank in South Sudan 2022 Available from:  
483 <https://www.worldbank.org/en/country/southsudan/overview>.
- 484 2. Center for Preventive Action. Civil War in South Sudan: Council on Foreign Relations;  
485 2022. Available from: [https://www.cfr.org/global-conflict-tracker/conflict/civil-war-](https://www.cfr.org/global-conflict-tracker/conflict/civil-war-south-sudan)  
486 [south-sudan](https://www.cfr.org/global-conflict-tracker/conflict/civil-war-south-sudan).
- 487 3. Concern Worldwide. The South Sudan crisis, explained: 5 things you need to know in  
488 2022 2022. Available from: <https://www.concern.net/news/south-sudan-crisis-explained>.
- 489 4. Mercy Corps. The facts: What you need to know about the South Sudan crisis. 2019.
- 490 5. United Nations High Commissioner for Refugees. South Sudan refugee crisis explained.  
491 United States Association for UNHCR 2019. Available from:  
492 <https://www.unrefugees.org/news/south-sudan-refugee-crisis-explained/>.
- 493 6. World Health Organization. South Sudan crisis 2022. Available from:  
494 <https://www.who.int/emergencies/situations/south-sudan-crisis>.
- 495 7. World Health Organization. South Sudan: WHO's global health emergency appeal  
496 COVID-19 2022. Available from: [https://www.who.int/publications/m/item/who-global-](https://www.who.int/publications/m/item/who-global-health-emergency-appeal-south-sudan)  
497 [health-emergency-appeal-south-sudan](https://www.who.int/publications/m/item/who-global-health-emergency-appeal-south-sudan).
- 498 8. Quarcoo A. A brief guide to South Sudan's fragile peace: Carnegie Endowment for  
499 International Peace; 2019. Available from:  
500 [https://carnegieendowment.org/2019/12/12/brief-guide-to-south-sudan-s-fragile-peace-](https://carnegieendowment.org/2019/12/12/brief-guide-to-south-sudan-s-fragile-peace-pub-80570)  
501 [pub-80570](https://carnegieendowment.org/2019/12/12/brief-guide-to-south-sudan-s-fragile-peace-pub-80570).
- 502 9. Hussien HH. Epidemiological descriptive analysis of disease outbreaks in 2019 in Sudan.  
503 Open Journal of Epidemiology. 2020;10(04):419-31.
- 504 10. Abubakar A, Bwire G, Azman AS, Bouhenia M, Deng LL, Wamala JF, et al. Cholera  
505 epidemic in South Sudan and Uganda and need for international collaboration in Cholera  
506 control. Emerg Infect Dis. 2018;24(5):883-7.
- 507 11. Centers for Disease Control and Prevention. CDC in South Sudan 2022. Available from:  
508 <https://www.cdc.gov/globalhealth/countries/south-sudan/default.htm>.
- 509 12. Widdig H, Tromp N, Lutwama GW, Jacobs E. The political economy of priority-setting  
510 for health in South Sudan: a case study of the health pooled fund. Int J Equity Health.  
511 2022;21(1):68.
- 512 13. South Sudan HIV/AIDS Commission. South Sudan National HIV and AIDS strategic  
513 plan 2018 – 2022. 2017
- 514 14. UNAIDS. South Sudan - Country fact sheet. Available from:  
515 <https://www.unaids.org/en/regionscountries/countries/southsudan>.
- 516 15. Courtney LP, Goco N, Woja J, Farris T, Cumiskey C, Smith E, et al. HIV prevalence  
517 and behavioral risk factors in the Sudan People's Liberation Army: Data from South  
518 Sudan. PLoS One. 2017;12(11):e0187689.
- 519 16. UNAIDS. Global HIV & AIDS statistics — Fact sheet 2022. Available from:  
520 <https://www.unaids.org/en/resources/fact-sheet>.
- 521 17. World Health Organization. Consolidated guidelines on HIV prevention, diagnosis,  
522 treatment and care for key populations Geneva2016. Available from:  
523 <https://apps.who.int/iris/handle/10665/246200>.
- 524 18. Bailey RC, Moses S, Parker CB, Agot K, Maclean I, Krieger JN, et al. Male circumcision  
525 for HIV prevention in young men in Kisumu, Kenya: a randomised controlled trial.  
526 Lancet. 2007;369(9562):643-56.

- 527 19. Auvert B, Taljaard D, Lagarde E, Sobngwi-Tambekou J, Sitta R, Puren A. Randomized,  
528 controlled intervention trial of male circumcision for reduction of HIV infection risk: the  
529 ANRS 1265 Trial. *PLoS Med*. 2005;2(11):e298.
- 530 20. Gray RH, Kigozi G, Serwadda D, Makumbi F, Watya S, Nalugoda F, et al. Male  
531 circumcision for HIV prevention in men in Rakai, Uganda: a randomised trial. *Lancet*.  
532 2007;369(9562):657-66.
- 533 21. World Health Organization. New data on male circumcision and HIV Prevention: policy  
534 and programme implications. 2007.
- 535 22. Schwartlander B, Stover J, Hallett T, Atun R, Avila C, Gouws E, et al. Towards an  
536 improved investment approach for an effective response to HIV/AIDS. *Lancet*.  
537 2011;377(9782):2031-41.
- 538 23. World Health Organization. Why the HIV epidemic is not over 2018 Available from:  
539 <https://www.who.int/news-room/spotlight/why-the-hiv-epidemic-is-not-over>.
- 540 24. Sanga ES, Mukumbang FC, Mushi AK, Lerebo W, Zarowsky C. Understanding factors  
541 influencing linkage to HIV care in a rural setting, Mbeya, Tanzania: qualitative findings  
542 of a mixed methods study. *BMC Public Health*. 2019;19(1):383.
- 543 25. Rachlis B, Naanyu V, Wachira J, Genberg B, Koech B, Kamene R, et al. Identifying  
544 common barriers and facilitators to linkage and retention in chronic disease care in  
545 western Kenya. *BMC Public Health*. 2016;16:741.
- 546 26. Adwar C, Puleh SS, Ochaba I, Ogweng I, Benyumiza D, Amusu K, et al. Factors  
547 associated with linkage to care following community-level identification of HIV-positive  
548 clients in Lira District. *Advances in Public Health*. 2022;2022:1-9.
- 549 27. Nakanwagi S, Matovu JK, Kintu BN, Kaharuza F, Wanyenze RK. Facilitators and  
550 barriers to linkage to HIV care among female sex workers receiving hiv testing services  
551 at a community-based organization in Periurban Uganda: a qualitative study. *J Sex*  
552 *Transm Dis*. 2016;2016:7673014.
- 553 28. MacPherson P, MacPherson EE, Mwale D, Bertel Squire S, Makombe SD, Corbett EL, et  
554 al. Barriers and facilitators to linkage to ART in primary care: a qualitative study of  
555 patients and providers in Blantyre, Malawi. *J Int AIDS Soc*. 2012;15(2):18020.
- 556 29. Duwell MM, Knowlton AR, Nachega JB, Efron A, Goliath R, Morroni C, et al. Patient-  
557 nominated, community-based HIV treatment supporters: patient perspectives, feasibility,  
558 challenges, and factors for success in HIV-infected South African adults. *AIDS Patient*  
559 *Care STDS*. 2013;27(2):96-102.
- 560 30. Sabin LL, Gifford AL, Haberer JE, Harvey K, Sarkisova N, Martin K, et al. Patients' and  
561 providers' views on optimal evidence-based and scalable interventions for individuals at  
562 high risk of hiv treatment failure: sequential explorations among key stakeholders in  
563 Cape Town, South Africa. *AIDS Behav*. 2022;26(8):2783-97.
- 564 31. Manwere A, Chipfuwa T. Causes of low uptake of Voluntary Medical Male Circumcision  
565 (VMMC) as an HIV prevention measure among men aged between 18 and 49 years in  
566 Zimbabwe - A case of Mazowe District. *The International Journal's Research Journal of*  
567 *Social Science & Management*. 2014;4:1-8.

568

569
